# Supplementary material for: Aloe arborescens: In Vitro Screening of Genotoxicity, Effective Inhibition of Enzyme Characteristics for Disease Etiology, and Microbiological Activity
Source: MDPI journal article supplement (doi:10.3390/molecules27072323), 2022-04-03
Supplement: s1 [file s1]

## Article

# *Aloe arborescens*—In Vitro Screening of Safety, Effective Inhibition of Enzymes Characteristic for Disease Etiology and Microbiological Activity

Kamil Pawłowicz <sup>1,2</sup>, Szymon Sip <sup>2</sup>, Tomasz Plech <sup>3</sup>, Barbara Kaproń <sup>4</sup>, Joanna Kobus-Cisowska <sup>5</sup>,  
Judyta Cielecka-Piontek<sup>2,\*</sup>

<sup>1</sup> Phytopharm Kłęka S.A., Kłęka 1, 63-040 Nowe Miasto nad Wartą, Poland; Kamil.pawalowicz@europlant-group.pl (K.P.)

<sup>2</sup> Department of Pharmacognosy, Poznan University of Medical Sciences, Rokietnicka 3, 60-806 Poznań, Poland; dsiakowska@ump.edu.pl (D.L.), szymonsip@ump.edu.pl (S.S.), jpiontek@ump.edu.pl (J.C.-P.)

<sup>3</sup> Department of Pharmacology, Medical University of Lublin, Chodźki 4a, 20093 Lublin, Poland; tomasz.plech@umlub.pl (T.P.)

<sup>4</sup> Department of Clinical Genetics, Medical University of Lublin, Radziwiłłowska 11, 20-080 Lublin, Poland; barbara.kapron@umlub.pl (B.K.)

<sup>5</sup> Department of Gastronomy Sciences and Functional Foods, Faculty of Food Science and Nutrition, Poznan University of Life Sciences (PULS), Wojska Polskiego Str. 28, 60-637 Poznań, Poland; joanna.kobus-cisowska@up.poznan.pl (J.K.-C.)

\* Correspondence: : jpiontek@ump.edu.pl

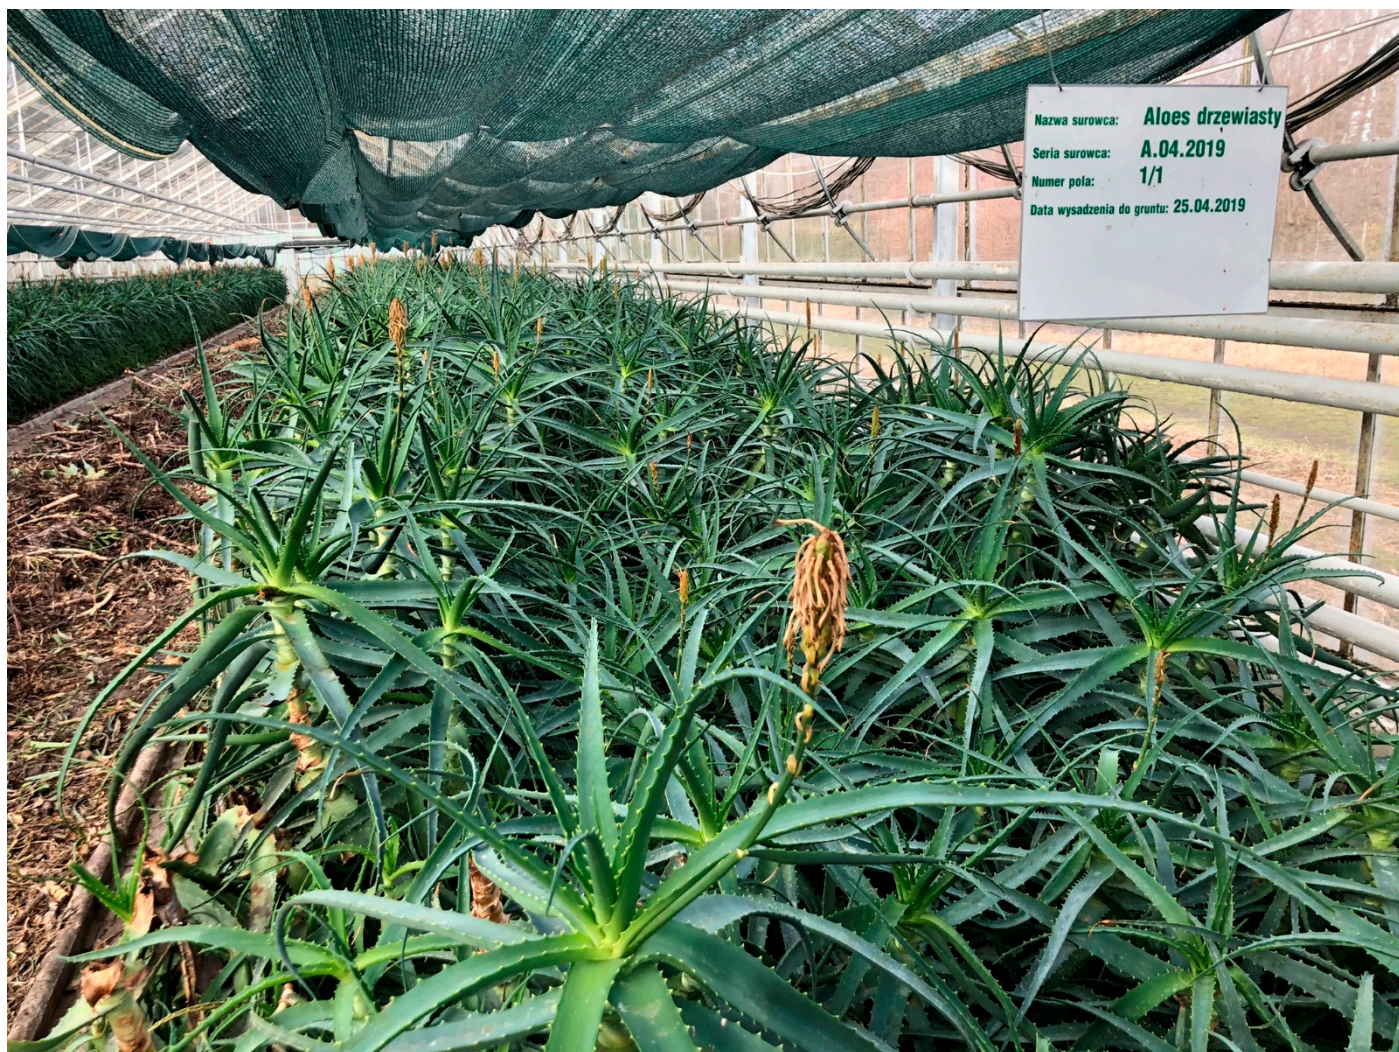

**Figure S1.** Cultivation of *Aloe arborescens* in the 3rd year of growth.



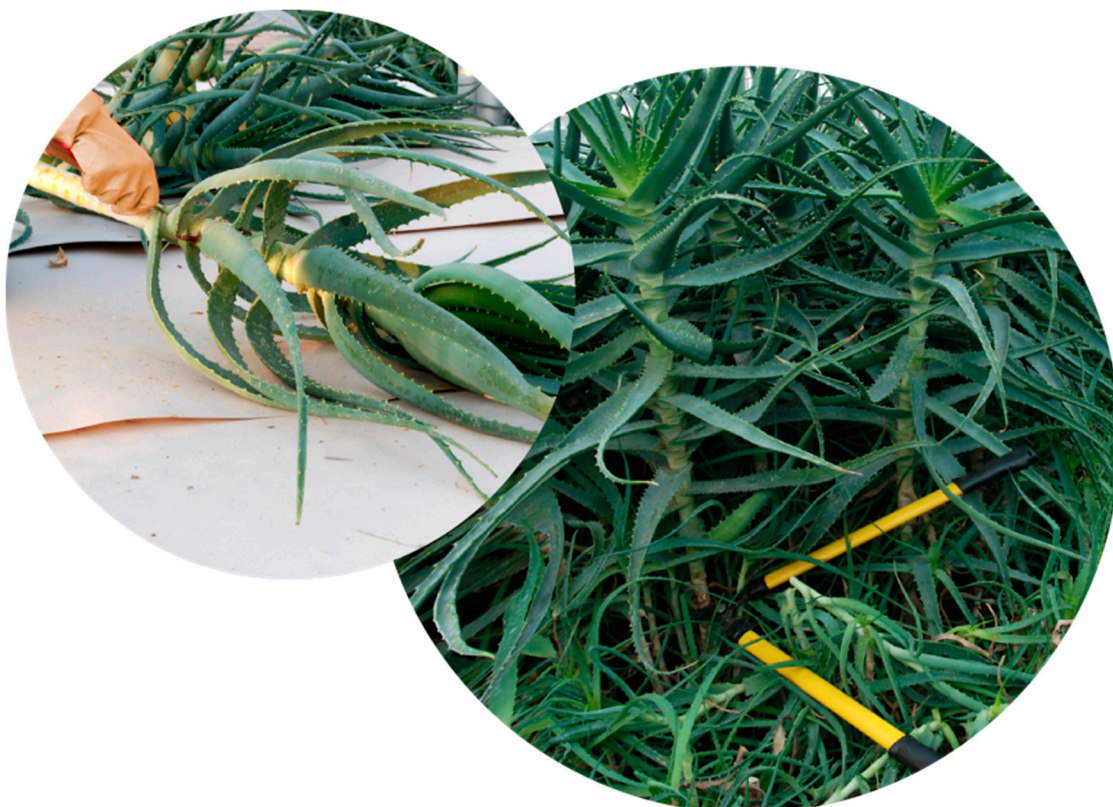

**Figure S2.** A method of obtaining leaves from mature plants of *Aloe arborescens*.

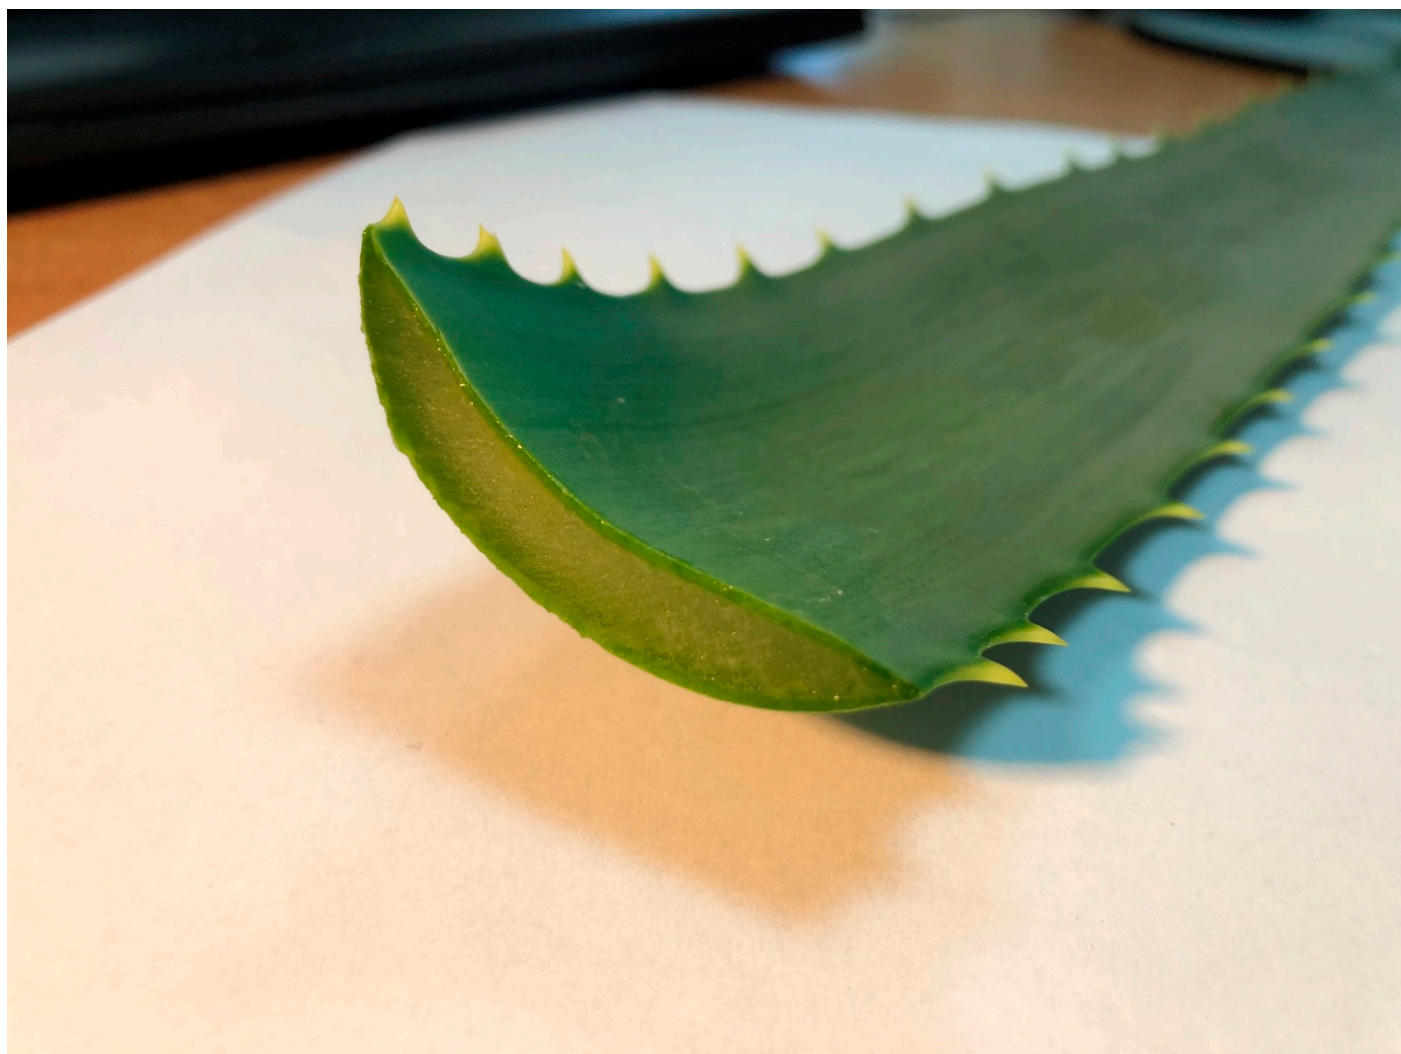

**Figure S3.** Freshly cut leaf of *Aloe arborescens* prepared to obtain the pulp.

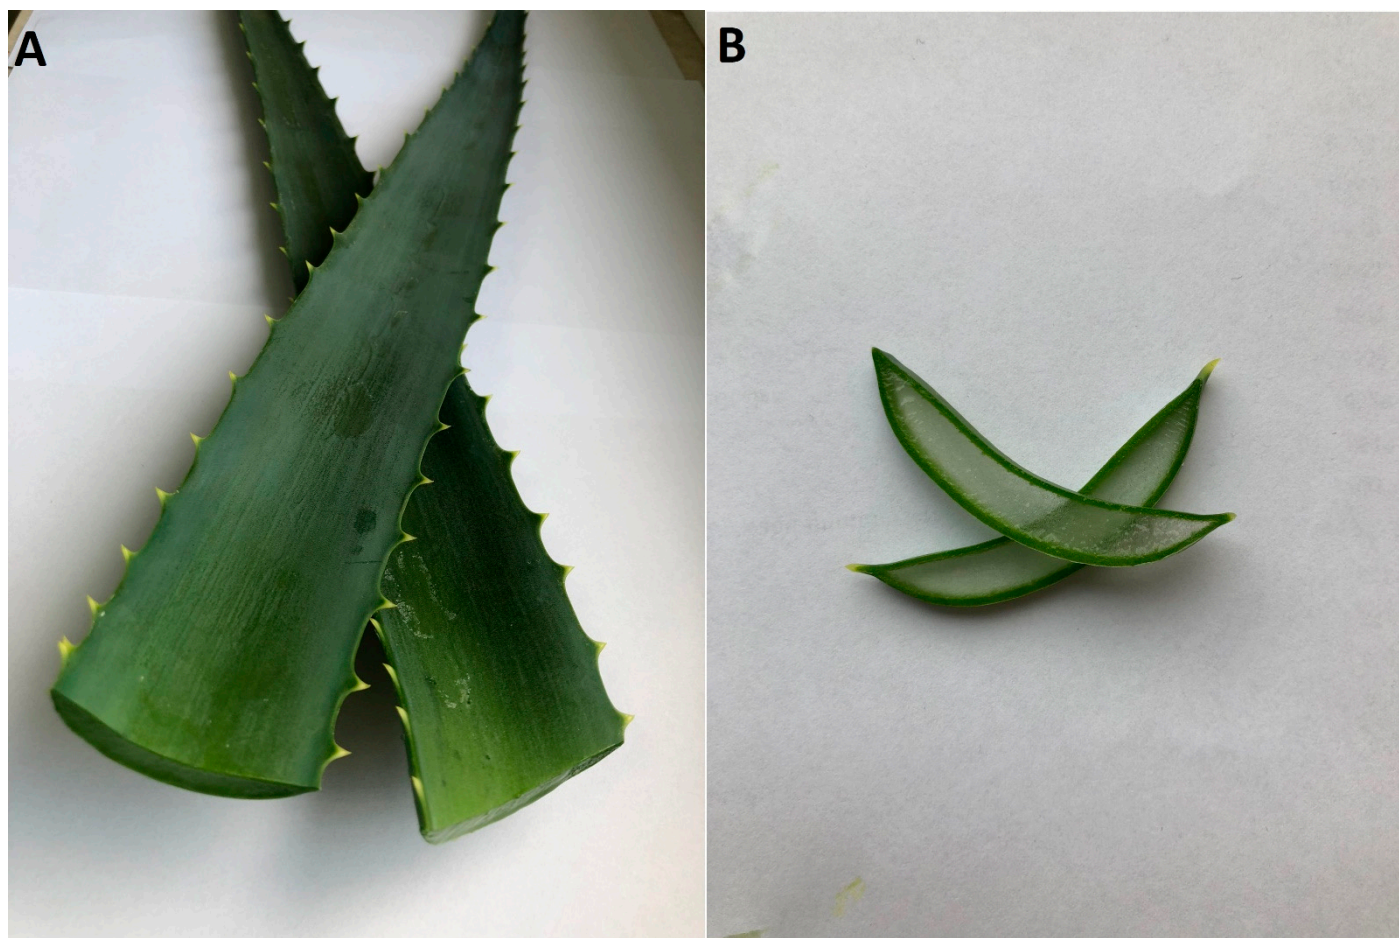

**Figure S4.** *Aloe arborescens* leaf : freshly cut (A) and cross-section with visible pulp (B).
